# Supplementary material
Source: Springer Nature journal article supplement (https://www.springermedizin.de/resource/supplementary/13058_2013_3270_MOESM6_ESM.pdf/9703706)

**A**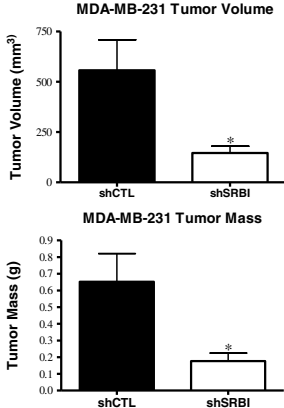**B**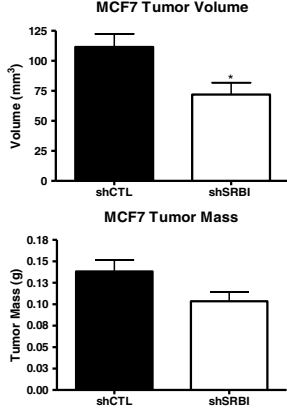**C**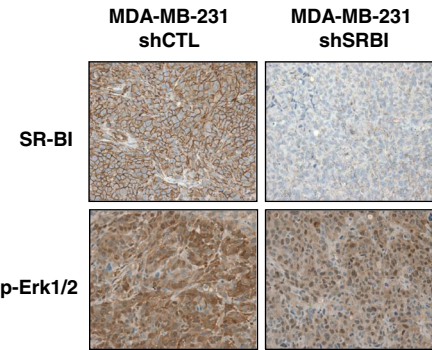**D**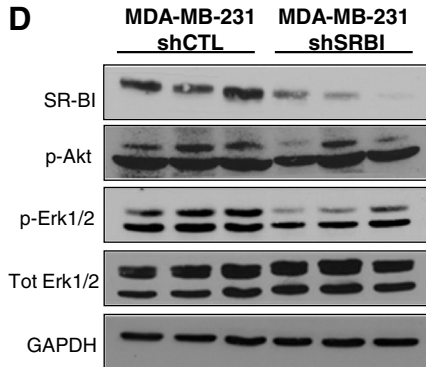

Supplement: MOESM6 [file 9703706]
